# Supplementary material for: Ligand exchange in quaternary alloyed nanocrystals – a spectroscopic study
Source: Royal Society of Chemistry journal article supplement (doi:10.1039/c4cp03850a), 2014-01-01
Supplement: c4cp03850a1.pdf [file c4cp03850a1.pdf]

## Electronic Supplementary Information

### Ligand exchange in quaternary alloyed nanocrystals – a spectroscopic study

Grzegorz Gabka<sup>a</sup>, Piotr Bujak<sup>a\*</sup>, Kamila Giedyk<sup>a</sup>, Kamil Kotwica<sup>a</sup>, Andrzej Ostrowski<sup>a</sup>,  
Karolina Malinowska<sup>b</sup>, Wojciech Lisowski<sup>c</sup>, Janusz W. Sobczak<sup>c</sup> and Adam Pron<sup>a</sup>

<sup>a</sup>Faculty of Chemistry, Warsaw University of Technology Noakowskiego 3, 00-664 Warsaw, Poland

<sup>b</sup>Faculty of Chemistry, University of Warsaw, Pasteura 1, 02-093 Warsaw, Poland

<sup>c</sup>Institute of Physical Chemistry, Polish Academy of Science, Kasprzaka 44/52, 01-224 Warsaw, Poland

Corresponding Author

\*E-mail: piotr**bujak**chem@poczta.onet.pl

### Experimental

#### Synthesis of copper(II) oleate<sup>1</sup>

Copper(II) oleate was prepared by reacting CuCl<sub>2</sub> with sodium oleate. Sodium oleate (80 mmol, 29.7 g) and CuCl<sub>2</sub>×2H<sub>2</sub>O (40 mmol, 6.9 g) were dissolved in a mixed solvent composed of 80 mL of ethanol, 60 mL of water and 140 mL of hexane. The mixture was heated to 70 °C and then kept at this temperature for four hours. The organic layer containing the desired product was washed three times with 30 mL of water in a separatory funnel. After washing, hexane layer was evaporated and the resulting product (copper(II) oleate) was recovered in a form of a green waxy solid.

## Characterization of Cu-In-Zn-S nanocrystals

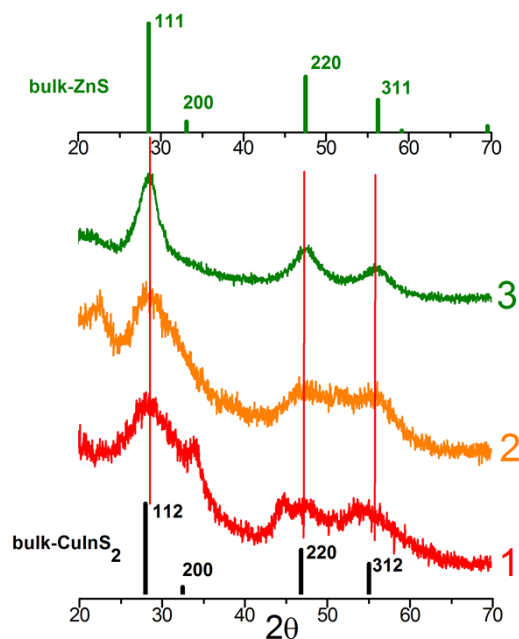

**Figure S1.** X-ray diffractogram of alloyed Cu-In-Zn-S quaternary nanocrystals obtained from reaction mixtures of Cu/In/Zn/DDT ratio = 1/13/20/21 (batch 1); 1/13/25/50 (batch 2) and 1/38/56/116 (batch 3). For comparison purposes, XRD patterns of the cubic<sup>2</sup> ZnS crystal (top patterns) and the roquesite<sup>3</sup> CuInS<sub>2</sub> crystal (bottom patterns) are also provided.

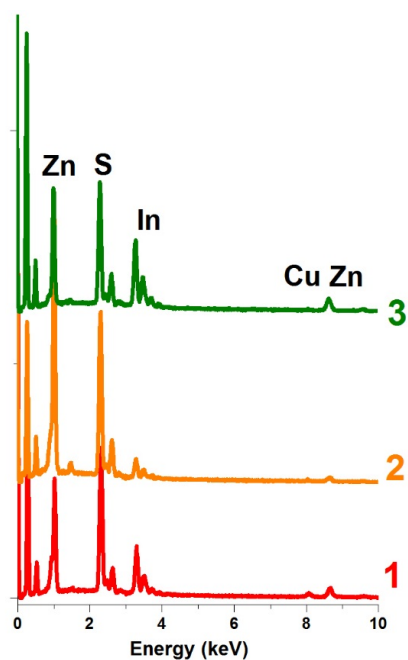

**Figure S2.** Energy-dispersive spectra of Cu-In-Zn-S nanocrystals.

**Table S1.** EDS characteristics of alloyed Cu-In-Zn-S nanocrystals.

|   | Cu/In/Zn/DDT <sup>a</sup> | Cu/In/Zn <sup>b</sup> |
|---|---------------------------|-----------------------|
| 1 | <b>1/13/10/21</b>         | <b>1.0/2.1/3.9</b>    |
| 2 | <b>1/13/25/50</b>         | <b>1.0/2.7/15.6</b>   |
| 3 | <b>1/38/56/116</b>        | <b>1.0/15.0/24.0</b>  |

<sup>a</sup>precursors molar ratio; <sup>b</sup>ratio of elements in the nanocrystals from EDS

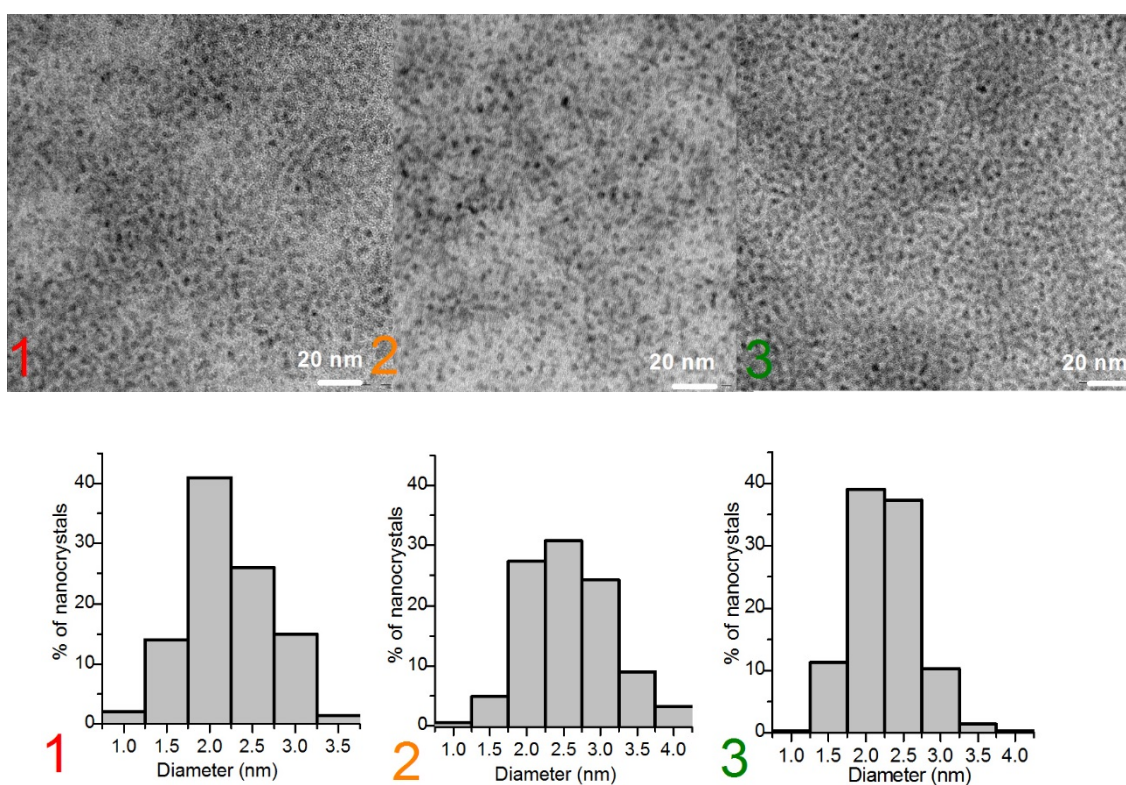

**Figure S3.** TEM images and histograms of Cu-In-Zn-S nanocrystals.

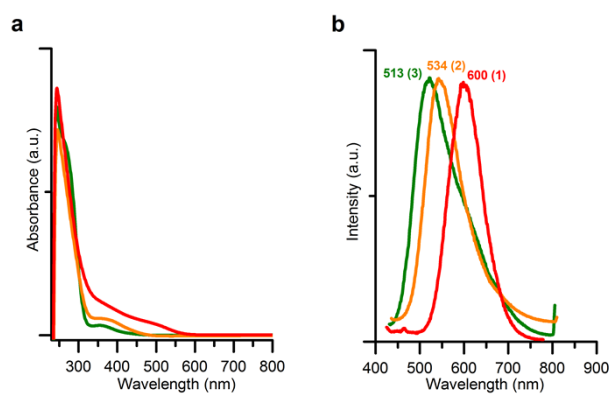

**Figure S4.** Absorption (a) and emission spectra of the Cu-In-Zn-S nanocrystals

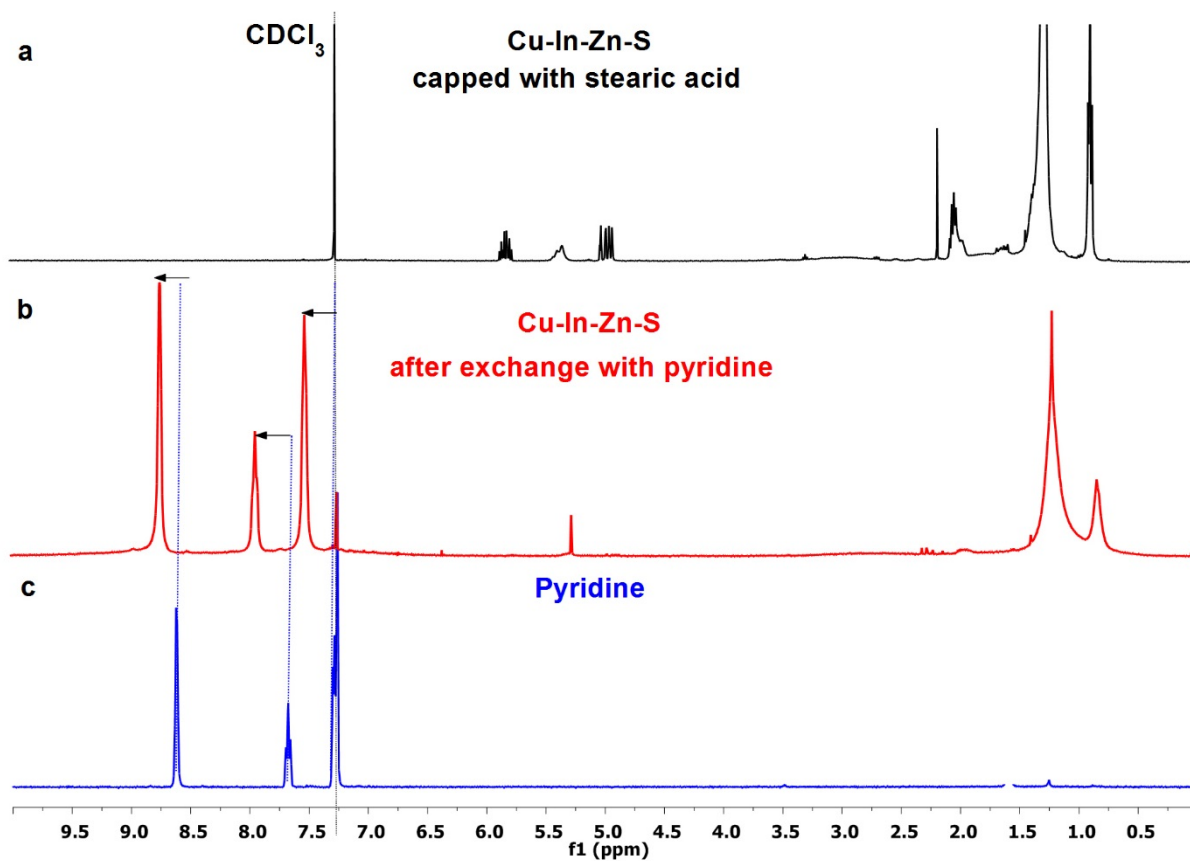

**Figure S5.**  $^1\text{H}$  NMR spectra of stearic acid – capped Cu-In-Zn-S nanocrystals before (a) and after (b) exchange with pyridine and of pyridine (c) in  $\text{CDCl}_3$ .

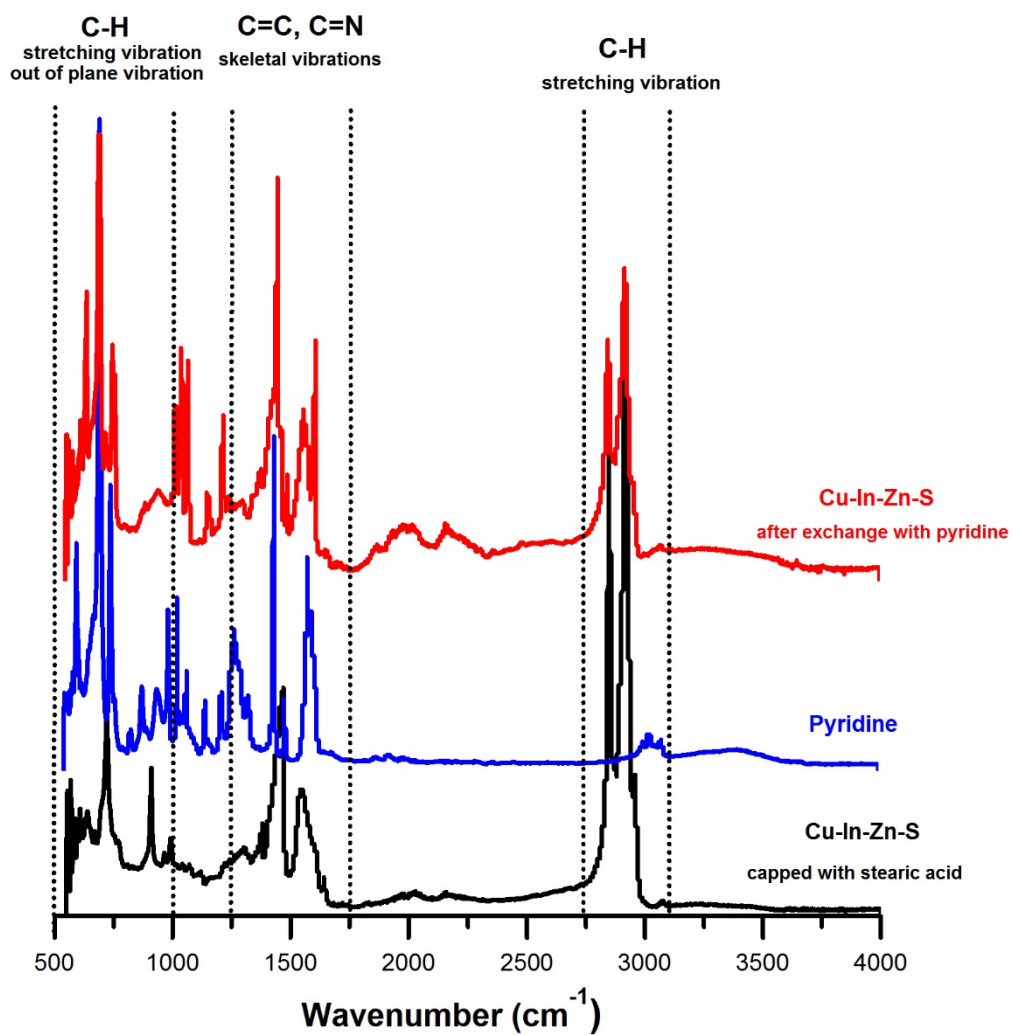

**Figure S6.** FT-IR spectra of pyridine and of Cu-In-Zn-S nanocrystals before and after exchange with pyridine.

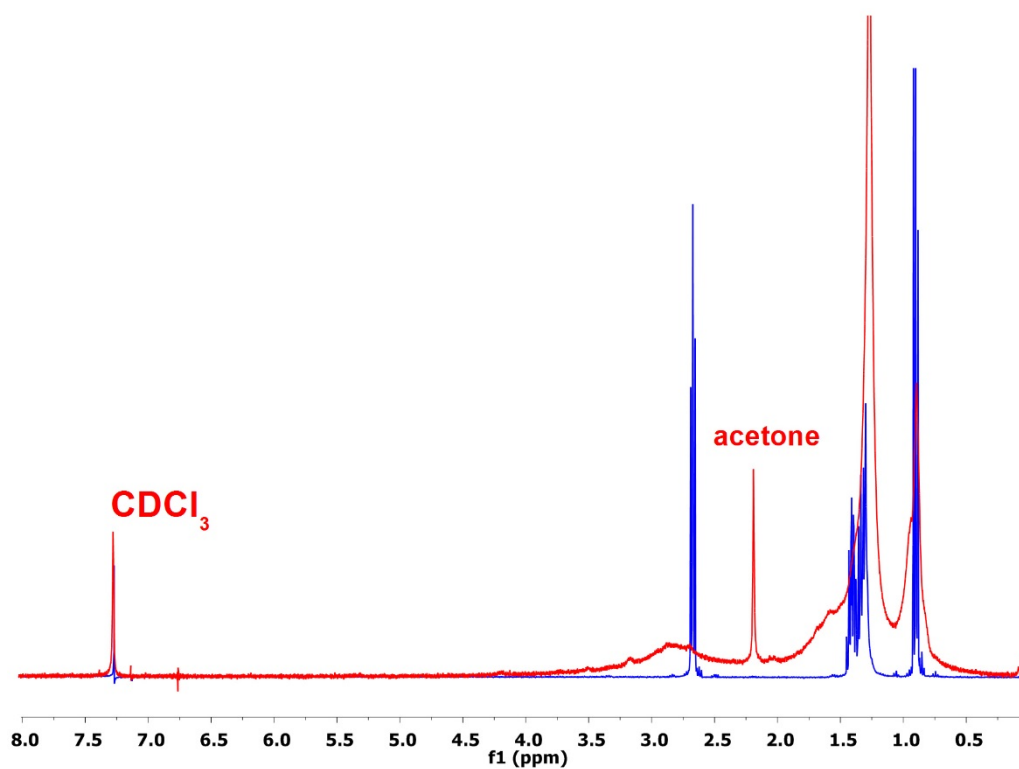

**Figure S7.**  $^1\text{H}$  NMR spectra of n-butylamine (blue) and of pyridine-capped Cu-In-Zn-S nanocrystals after ligand exchange with this compound (red) in  $\text{CDCl}_3$ .

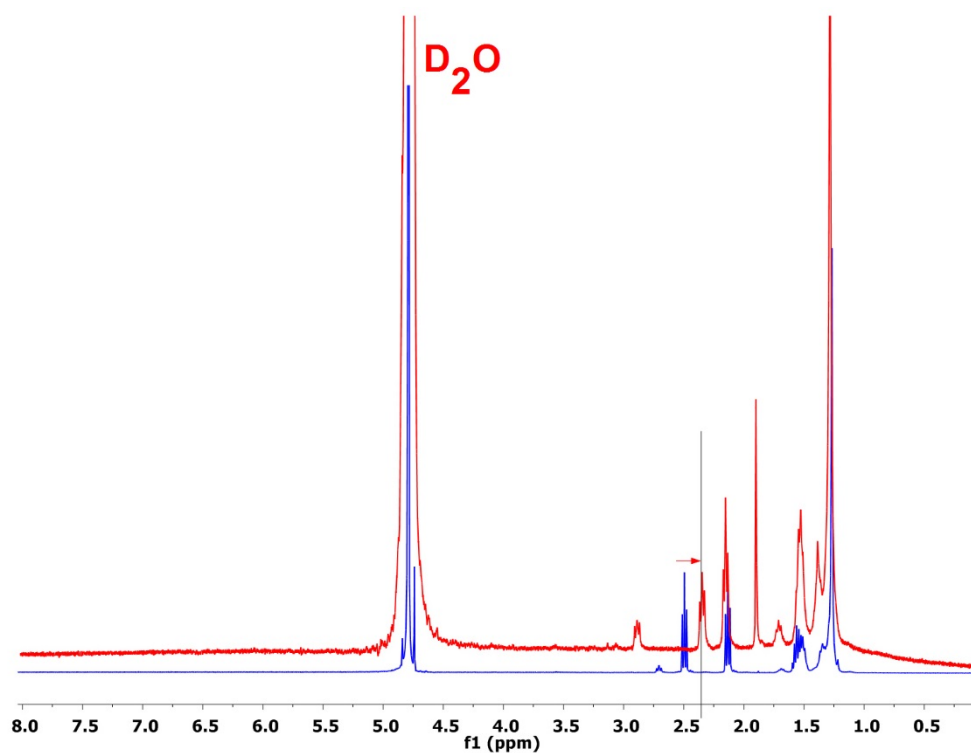

**Figure S8.**  $^1\text{H}$  NMR spectra of 11-mercaptoundecanoic acid (blue) and of pyridine-capped Cu-In-Zn-S nanocrystals after ligand exchange with this compound (red) in  $\text{D}_2\text{O}$  (pH = 9.0).

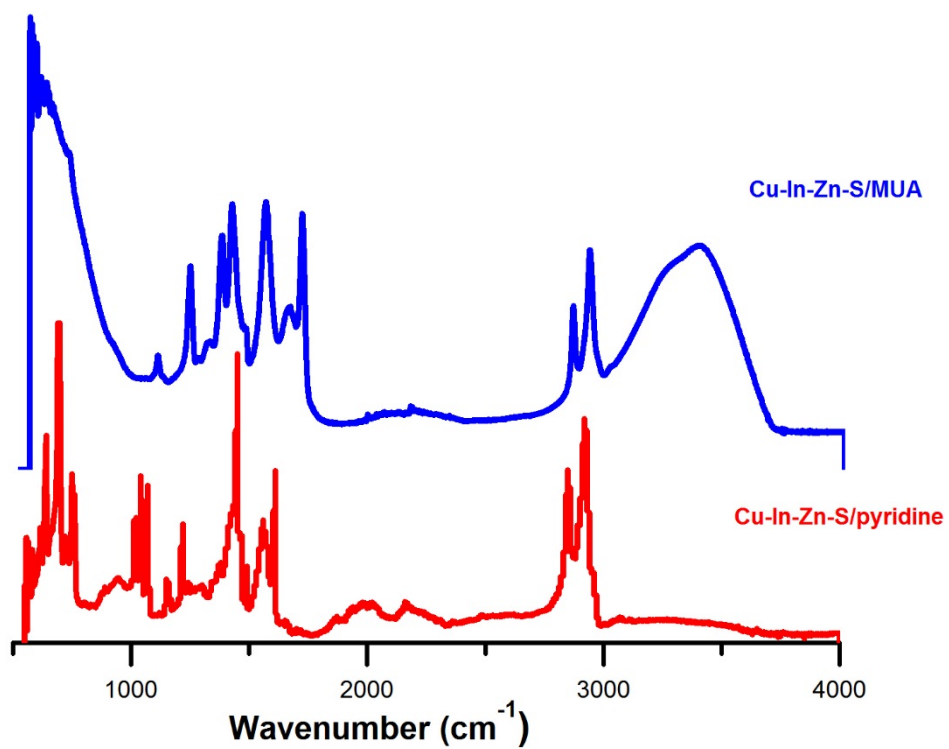

**Figure S9.** FT-IR spectra of pyridine-capped Cu-In-Zn-S nanocrystals and of 11-mercaptoundecanoic acid-capped Cu-In-Zn-S nanocrystals.

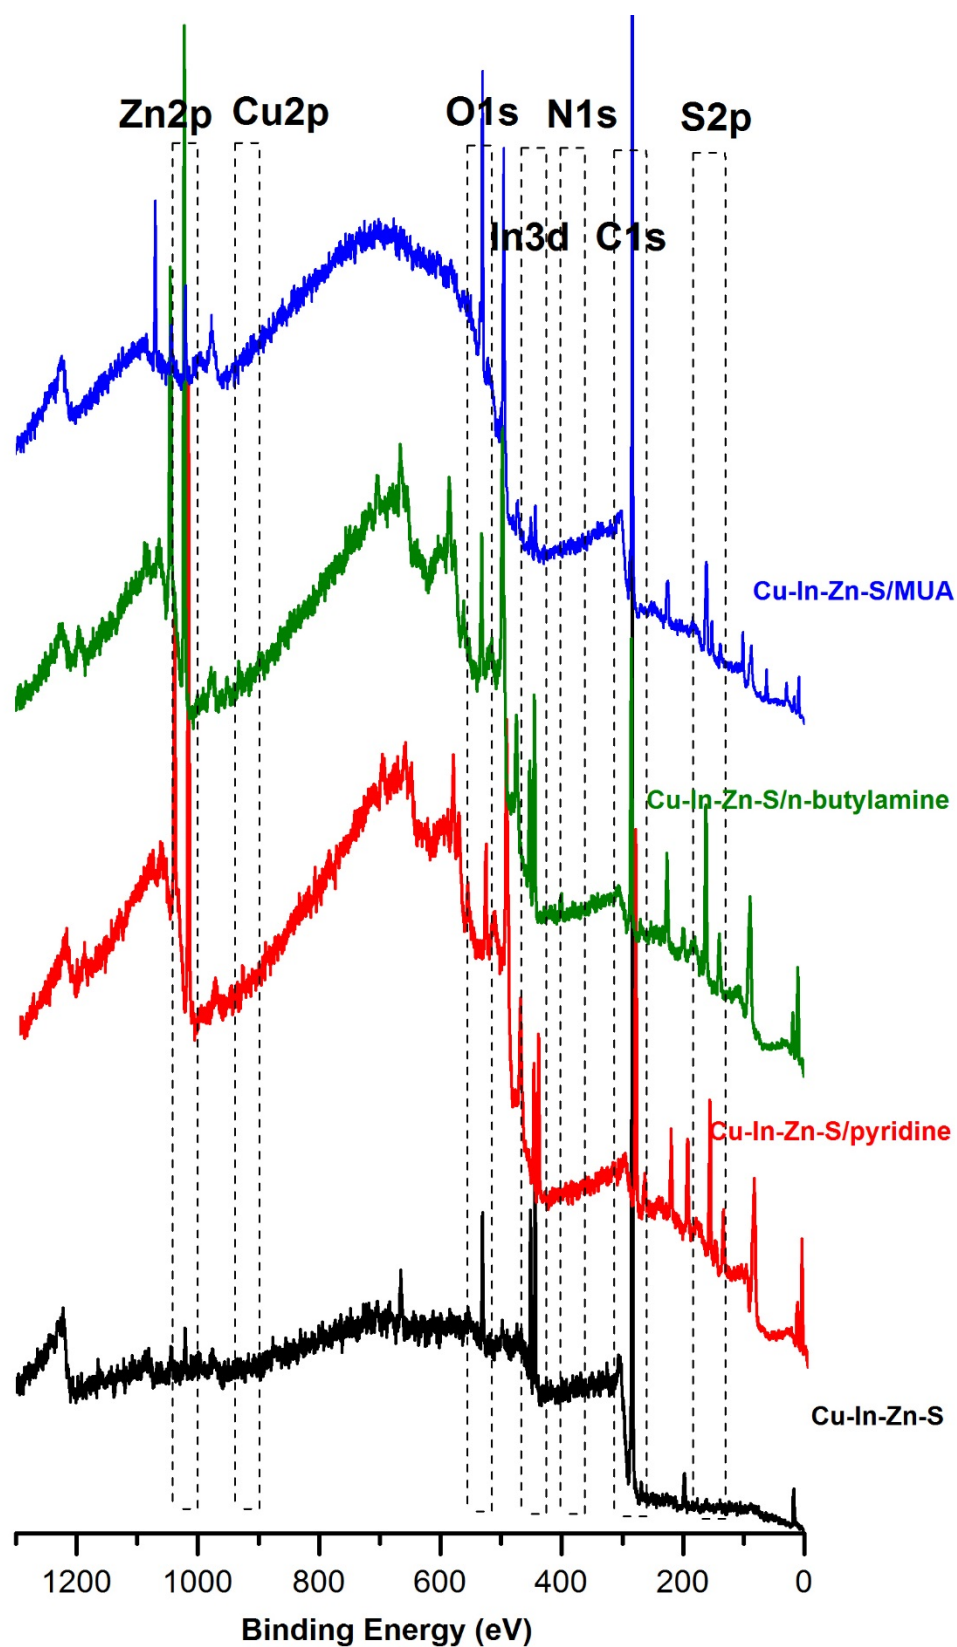

**Figure S10.** XPS survey spectra of stearic acid – capped Cu-In-Zn-S nanocrystals (black), pyridine – capped Cu-In-Zn-S nanocrystals (red), n-butylamine – capped Cu-In-Zn-S nanocrystals (green), MUA – capped Cu-In-Zn-S nanocrystals (blue).



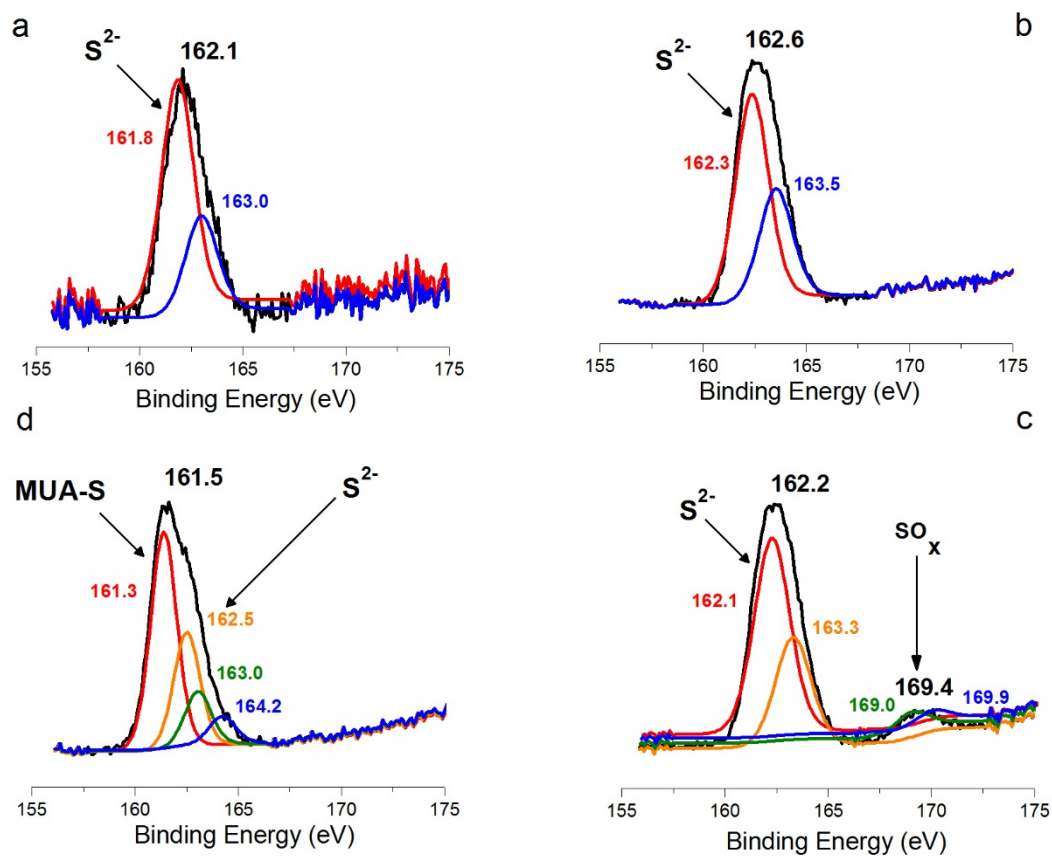

**Figure S11.** The high-resolution S<sub>2p</sub> XPS spectra of (a) stearic acid-, (b) pyridine-, (c) n-butylamine-, (d) MUA-capped Cu-In-Zn-S nanocrystals. Black lines-original spectra, color lines-deconvoluted spectra.

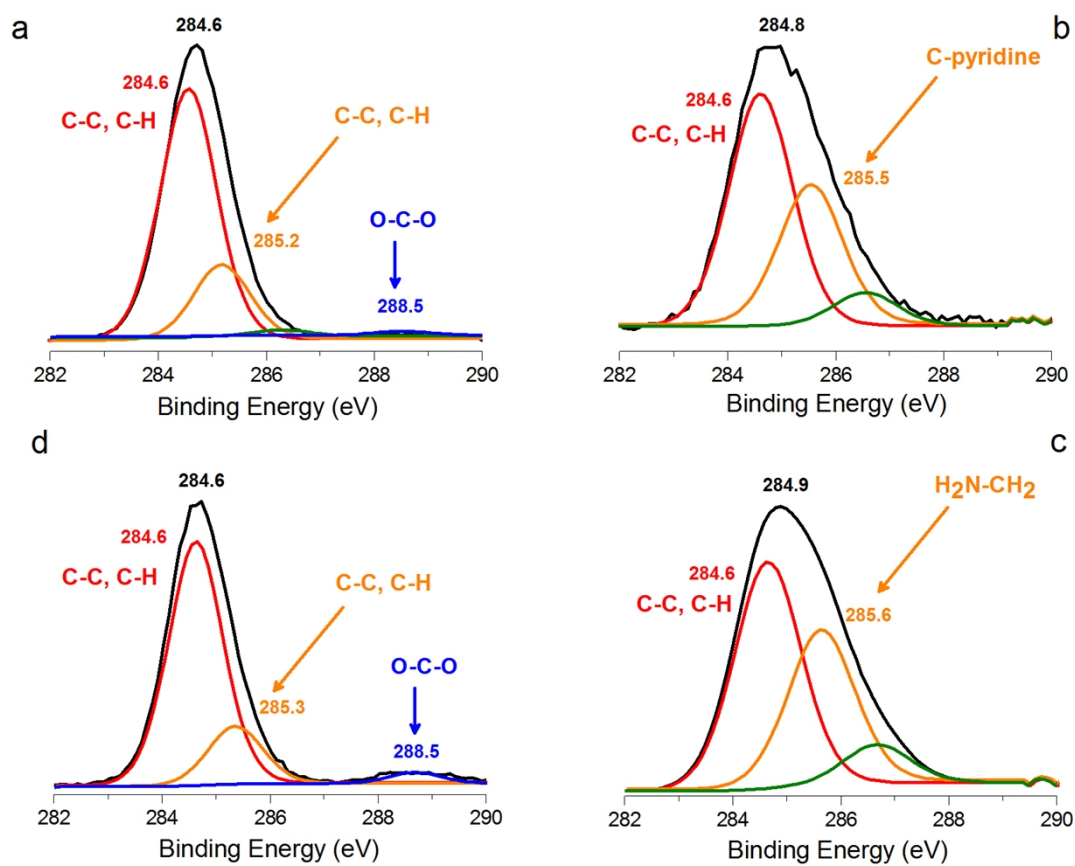

**Figure S12.** The high-resolution C1s XPS spectra of (a) stearic acid-, (b) pyridine-, (c) n-butylamine-, (d) MUA-capped Cu-In-Zn-S nanocrystals. Black lines – original spectra, color lines-deconvoluted spectra.

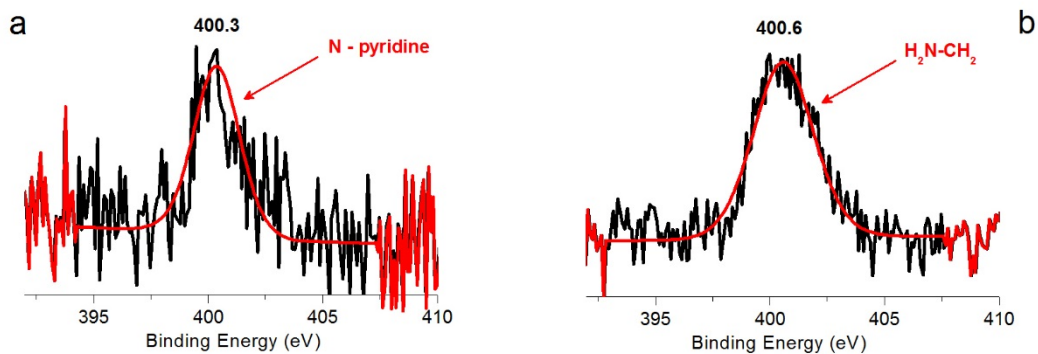

**Figure S13.** The high-resolution N1s XPS spectra of (a) pyridine-, (b) n-butylamine-capped Cu-In-Zn-S nanocrystals. Black lines-original spectra, red lines-deconvoluted spectra.

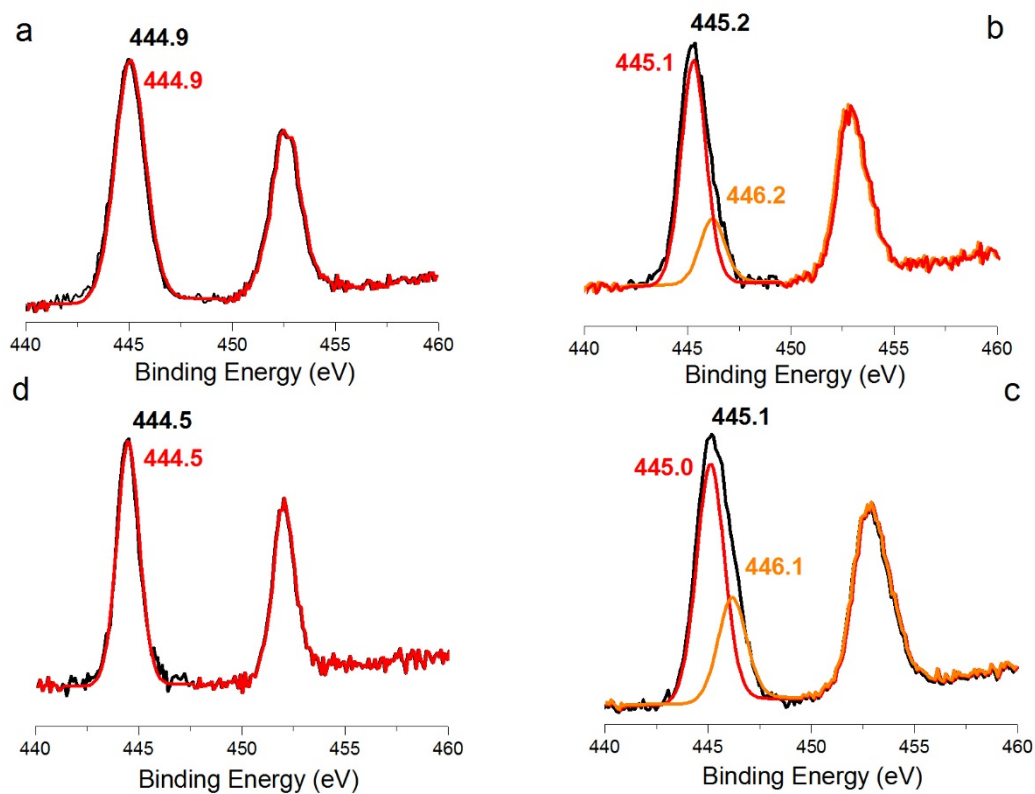

**Figure S14.** The high-resolution In3d XPS spectra of (a) stearic acid-, (b) pyridine-, (c) n-butylamine-, (d) MUA-capped Cu-In-Zn-S nanocrystals. Black lines-original spectra, color lines-deconvoluted spectra.

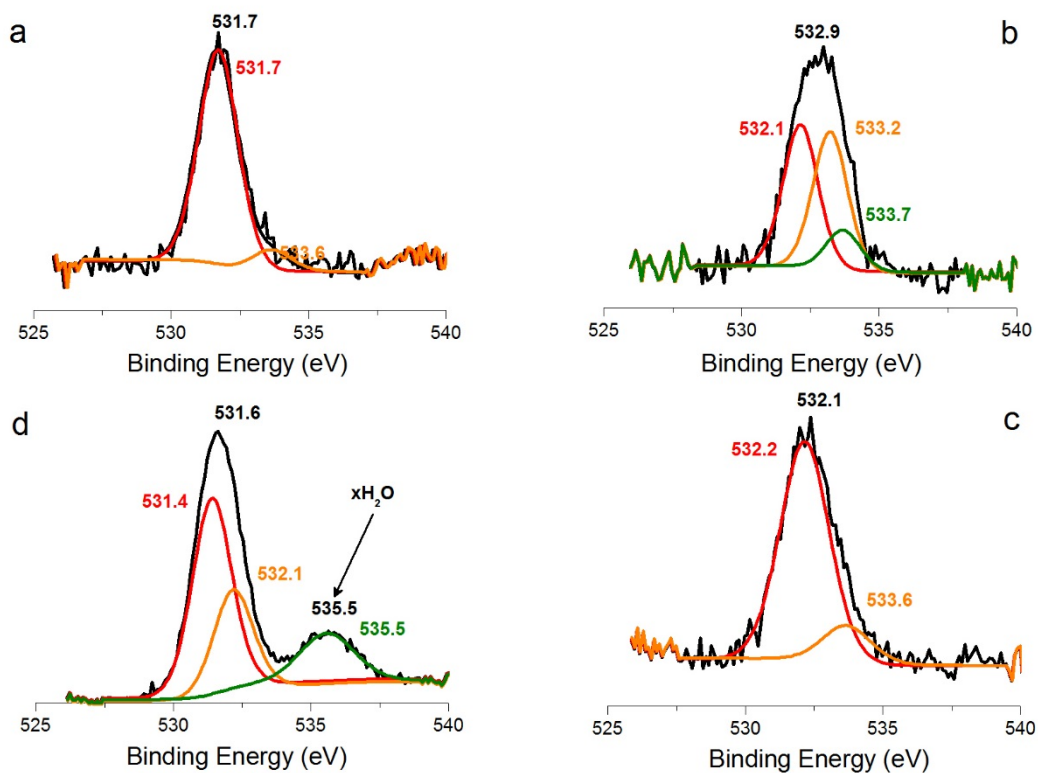

**Figure S15.** The high-resolution O1s XPS spectra of (a) stearic acid-, (b) pyridine-, (c) n-butylamine-, (d) MUA-capped Cu-In-Zn-S nanocrystals. Black lines-original spectra, color lines-deconvoluted spectra.

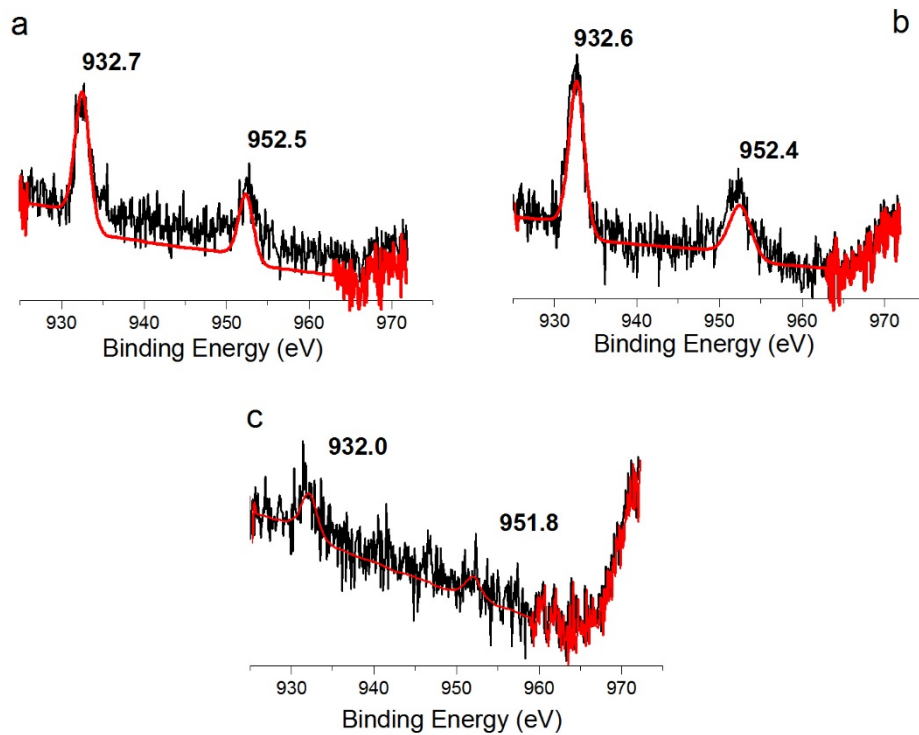

**Figure S16.** The high-resolution Cu<sub>2</sub>p XPS spectra of (a) pyridine-, (b) n-butylamine-, (c) MUA-capped Cu-In-Zn-S nanocrystals. Black lines-original spectra, red lines-deconvoluted spectra.

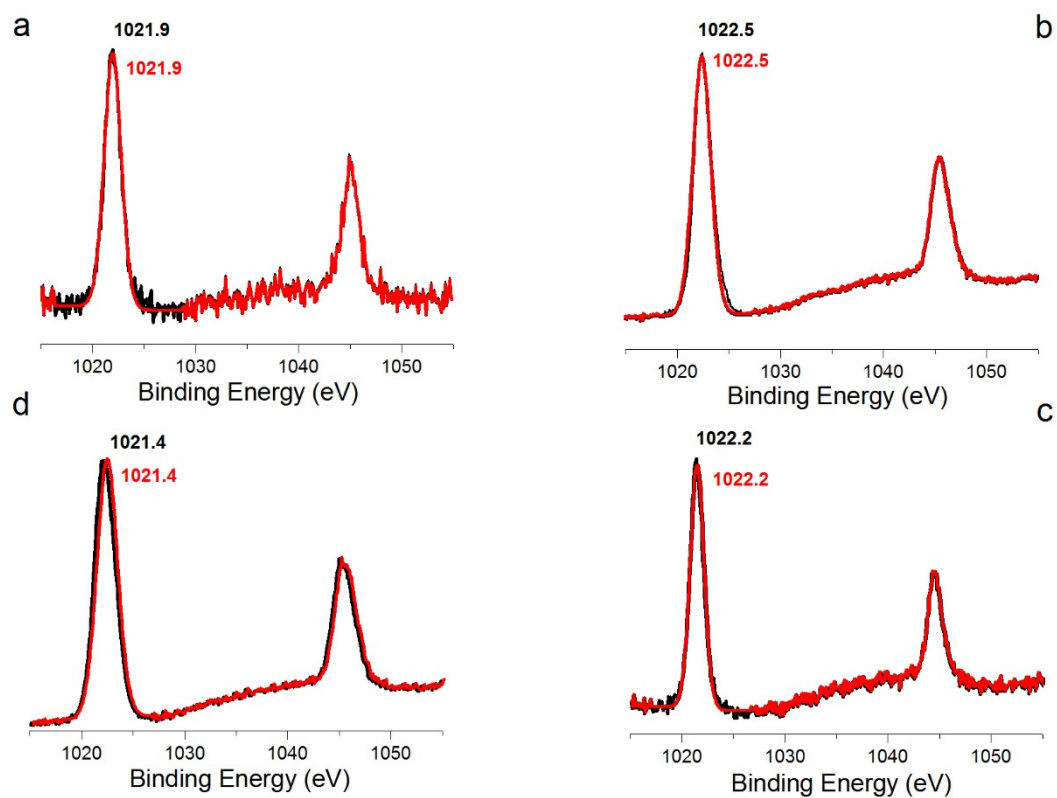

**Figure S17.** The high-resolution Zn<sub>2</sub>p XPS spectra of (a) pyridine-, (b) n-butylamine-, (c) MUA-capped Cu-In-Zn-S nanocrystals. Black color-original spectra, red color-deconvoluted spectra.

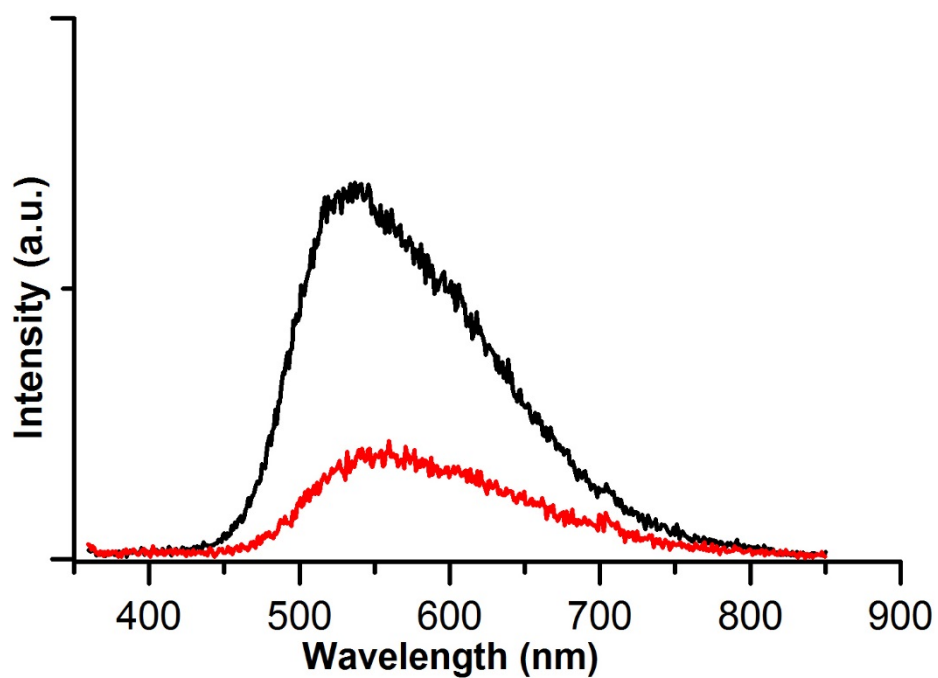

**Figure S18.** Emission spectra of (black) stearic acid, (red) pyridine – capped Cu-In-Zn-S nanocrystals in chloroform.

### Characterization of Cu-In-S nanocrystals

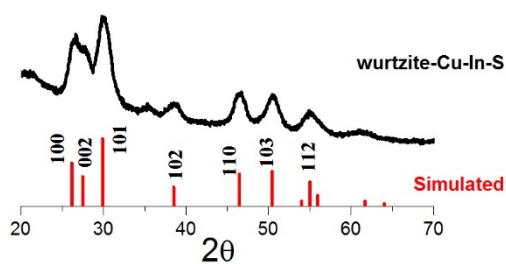

**Figure S19.** Experimental and simulated<sup>4</sup> XRD patterns of Cu-In-S nanocrystals with a wurtzite structure.

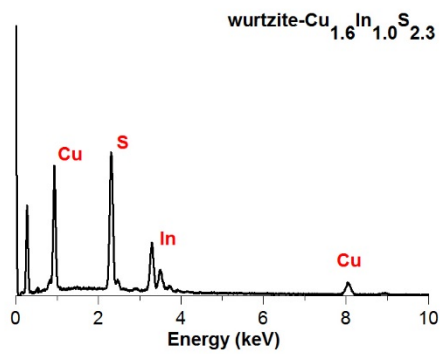

**Figure S20.** Energy dispersive spectrum of wurtzite Cu<sub>1.6</sub>In<sub>1.0</sub>S<sub>2.3</sub> nanocrystals.

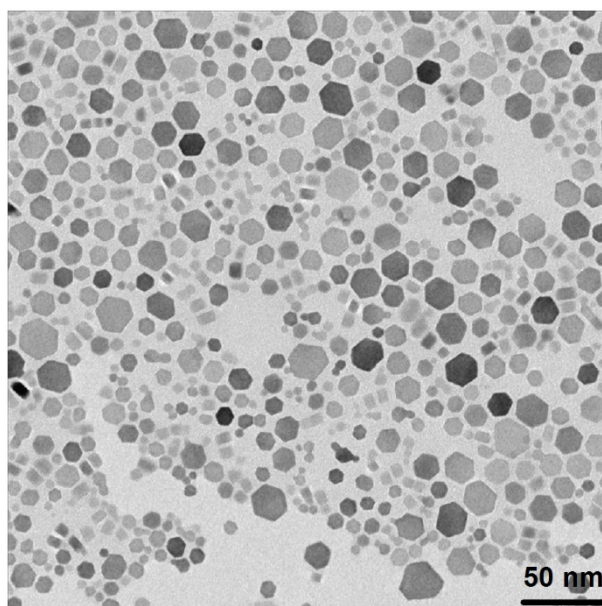

**Figure S21.** TEM image of wurtzite Cu<sub>1.6</sub>In<sub>1.0</sub>S<sub>2.3</sub> nanocrystals.



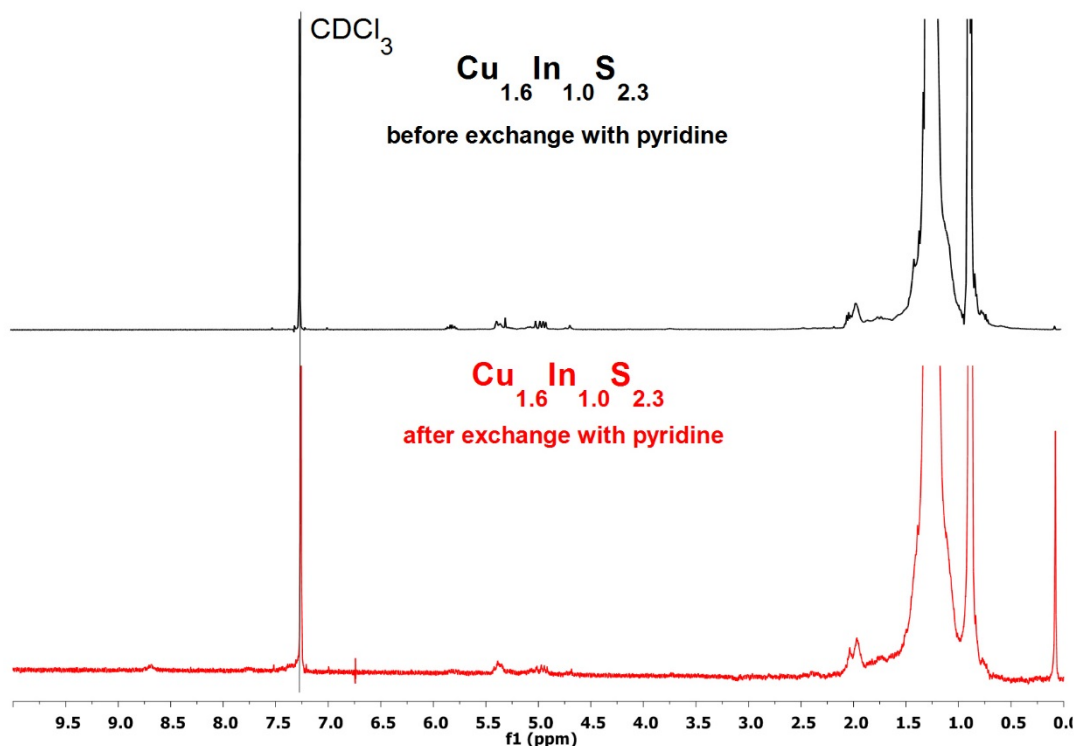

**Figure S22.**  $^1\text{H}$  NMR spectra of  $\text{Cu}_{1.6}\text{In}_{1.0}\text{S}_{2.3}$  nanocrystals before and after exchange with pyridine in  $\text{CDCl}_3$ .

### Characterization of Ag-In-Zn-S alloyed nanocrystals

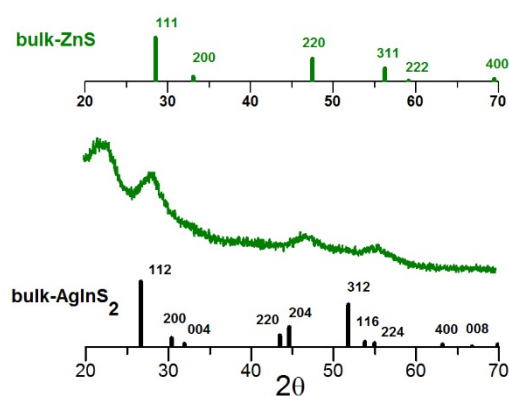

**Figure S23.** X-ray diffractogram of alloyed Ag-In-Zn-S quaternary nanocrystals obtained from reaction mixtures of Ag/In/Zn/DDT ratio = 1/5/14/26. For comparison purposes, XRD patterns of the cubic<sup>2</sup> ZnS crystal (top patterns) and the tetragonal<sup>5</sup> AgInS<sub>2</sub> crystal (bottom patterns) are also provided.

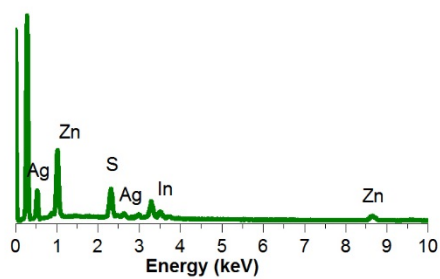

**Figure S24.** Energy dispersive spectrum of alloyed Ag-In-Zn-S nanocrystals. (Ag/In/Zn = 1.0/3.9/12.1)

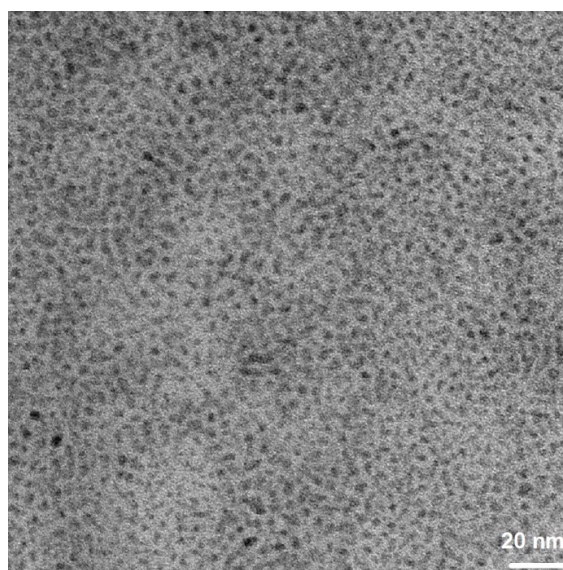

**Figure S25.** TEM image of alloyed Ag-In-Zn-S nanocrystals.

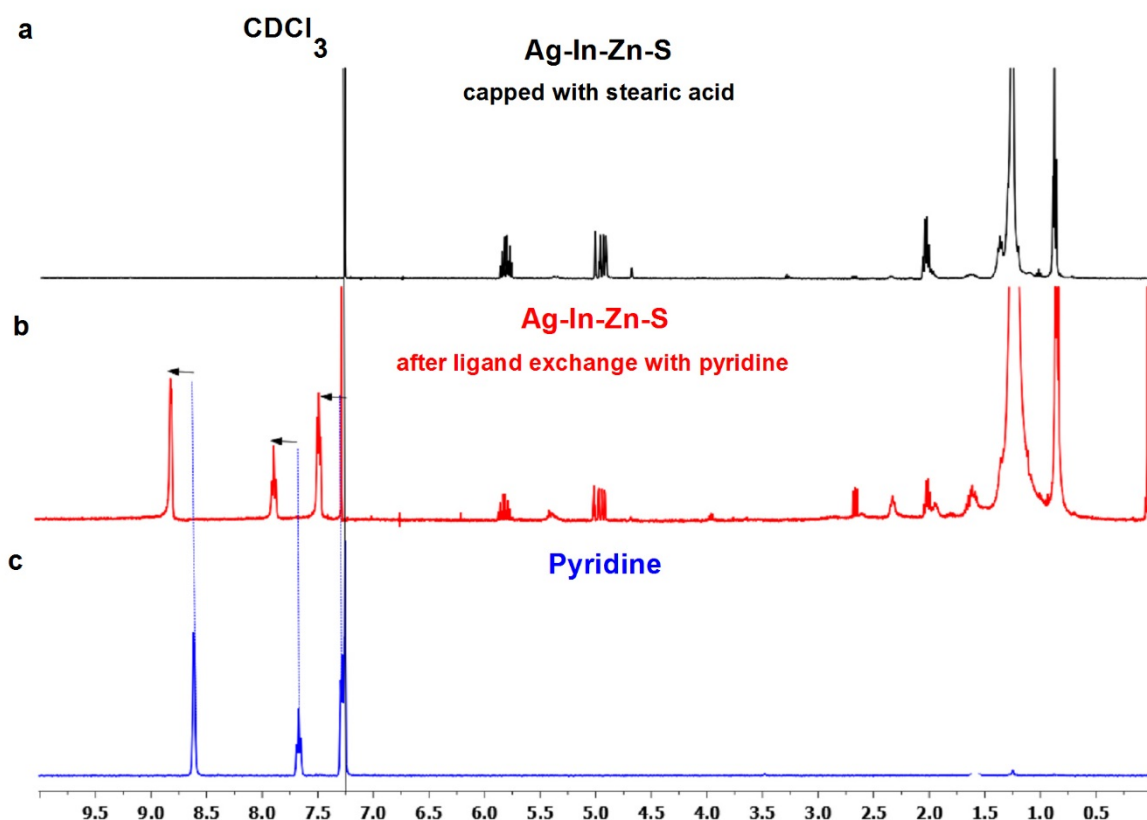

**Figure S26.**  $^1\text{H}$  NMR spectra of stearic acid – capped Ag-In-Zn-S nanocrystals before (a) and after (b) exchange with pyridine and of pyridine (c) in  $\text{CDCl}_3$ .

#### References:

- (1) J. Park, K. An, Y. Hwang, J.-G. Park, H.-J. Noh, J.-Y. Kim, J.-H. Park, N.-M. Hwang, T. Heyon, *Nat. Materials*, 2004, **3**, 891-895.
- (2) Powder Diffraction File, No. 50566; The JCPD International Centre for Diffraction Data: Swarthmore, PA, 1990.
- (3) Powder Diffraction File, No. 471372; The JCPD International Centre for Diffraction Data: Swarthmore, PA, 1990.
- (4) J. Chang and E. R. Waclawik, *CrystEngComm*, 2013, **15**, 5612-5619.
- (5) Powder Diffraction File, No. 251330; The JCPD International Centre for Diffraction Data: Swarthmore, PA, 1990.
